## **Language and the cerebellum: structural connectivity to the eloquent brain**

Abbreviated title: *Cerebellar white matter and language*

Katie R. Jobson<sup>1</sup>, Linda J. Hoffman<sup>1</sup>, Athanasia Metoki<sup>3</sup>, Haroon Popal<sup>1</sup>, Anthony Steven Dick<sup>4</sup>, Jamie Reilly<sup>1,2</sup>, Ingrid R. Olson<sup>1</sup>

<sup>1</sup>Temple University, Department of Psychology

<sup>2</sup>Temple University, Department of Speech and Language Sciences

<sup>3</sup>Washington University in St. Louis, Department of Neurology

<sup>4</sup>Florida International University, Department of Psychology

### **Address correspondence to:**

Ingrid R. Olson [iolson@temple.edu](mailto:iolson@temple.edu)

ORCID ID: 0000-0001-8947-6432) or

1701 North 13th Street,

Temple University,

Philadelphia, PA

**Acknowledgements:** We would like to thank Angela Piecyk, Marah Dormuth, Sarah Johnson, Giovanna Arantes De Oliveira Campos, and Jason Konadu for their work as research assistants on this project. We would also like to thank Huiling Peng for assistance with tractography.

This research includes calculations carried out on HPC resources supported in part by the National Science Foundation through major research instrumentation grant number 1625061 and by the US Army Research Laboratory under contract number W911NF-16-2-0189.

**Conflicts of interest:** Authors report no conflict of interest

**Funding sources:** This work was supported by a National Institute of Health grants to I. Olson (R21 HD098509; R01 NICHD R01HD099165; 2R56 MH091113). The content is solely the responsibility of the authors and does not necessarily represent the official views of the National Institute of Mental Health or the National Institutes of Health. The authors declare no competing financial interests.

**Key words:** white matter, frontal lobe, cerebellum, language, tractography, diffusion imaging, human connectome project

## *CEREBELLAR WHITE MATTER AND LANGUAGE*

### **Abstract**

Much remains to be learned about the role(s) of the cerebellum in the neurobiology of language. Contemporary models have focused extensively on the left-hemisphere perisylvian cortex with the assumption that the cerebellum supports more peri-linguistic cognitive processes (e.g., verbal working memory). The goal of this study was to map the structural connectivity profile of domain-specific language regions of interest (ROIs) implicated in semantics, phonology, and syntax relative to connectivity for working memory. Functional imaging data and diffusion-weighted imaging data from the Human Connectome Project (HCP) were analyzed. We found that (a) working memory, motor activity, and language comprehension activated partially overlapping but mostly unique regions of the cerebellum; (b) the linguistic portion of the cerebello-thalamo-cortical circuit was more extensive than the linguistic portion of the cortico-ponto-cerebellar tract; (c) there was a frontal-lobe bias in the connectivity from the cerebellum to the cerebrum; (d) there was some degree of specificity; and (e) for some of the cerebellar tracts, individual differences in picture identification ability correlated with variation in fractional anisotropy. These findings yield insights into the structural connectivity of the cerebellum as it relates to language comprehension – an ability that is unique to humans.

## CEREBELLAR WHITE MATTER AND LANGUAGE

### Language and the cerebellum: structural connectivity to the eloquent brain

#### Introduction

One of the most controversial issues in cognitive neuroscience today is whether the cerebellum deserves a seat at the table of the core language network. Neuromotor control of speech, which is important for both comprehension and production of language (Fischer & Zwaan, 2008), can be affected by cerebellar damage, with ataxic dysarthria being a common outcome of cerebellar damage (Spencer & Slocumb, 2007). However, there is growing evidence suggesting the cerebellum's involvement in language goes beyond its well-established role in the motor aspects of speech and comprehension (Mariën et al., 2014). The most compelling findings come from studies of individuals with damage to the posterior cerebellum and a disorder known as *cerebellar cognitive affective syndrome*. Individuals with this disorder have disruptions in many cognitive functions, including features of language (Schmahmann & Sherman, 1998). Prior work has found that individuals with this disorder often produce agrammatic language output (De Smet et al., 2007; Mariën et al., 2000; Silveri et al., 1994), with concurrent deficits in sentence comprehension (De Smet et al., 2007; Murdoch & Wheeler, 2007; Silveri et al., 2021), anomia as defined by deficits in word generation (Mariën et al., 2000; De Smet et al., 2007) and diminished verbal fluency (Hoche et al., 2018; Silveri et al., 2021). Although linguistic and motoric deficits are often co-morbid in acquired cerebellar injuries, these two domains are also dissociable (Ahmadian et al., 2019). The cerebellum has, however, proven to be a challenging and somewhat elusive lesion model. For example, people with acquired cerebellar injuries tend to experience rapid recovery of speech and language functions, with frank symptoms only apparent during the acute phase in adults (Fabbro et al., 2004).

## *CEREBELLAR WHITE MATTER AND LANGUAGE*

Neuroimaging studies have supplemented and extended patient-based case studies.

Recent studies have reported that language comprehension activates Lobule IV, Crus I & II and Lobule IX in the posterior cerebellum (Geva et al., 202; Vias & Dick, 2017), with a rightward cerebellar bias, due to the fact that cortico-cerebellar-cortical connections are crossed (Bostan, Drum & Strick, 2013). What is the computational role of this region in language? Several hypotheses have been offered. One idea is that the cerebellum modulates timing and sequencing of language production and language perception (Fiez, 2016; Ivry & Keele, 1989; Leggio & Mariën et al., 2014; Mariën & Borgatti, 2018; Molinari et al. 1997; Molinari, 2015; Salman, 2002; Schwatze and Kotz, 2016). Another hypothesis is that the cerebellum is involved in automatizing a range of behaviors, including language (Doyon et al., 1998; Fiez, 2016; Ramnani, 2014; Vicari et al., 2018; Yang et al., 2014). A final hypothesis is that the cerebellum's role in language is related to the more general role of the cerebellum in verbal working memory (Chen & Desmond, 2005; Desmond et al., 1997; Marvel & Desmond, 2010; Peterburs et al., 2021).

The comprehensive mapping of cortico-cerebellar connectivity can provide a framework upon which to understand function. More specifically, rather than understanding the role of the cerebellum in language more broadly, the mapping of the pathways that connect language-specific regions in the cerebellum and cerebral language regions may show some specificity. If this connectivity can be shown to be functionally specialized for particular linguistic sub-domains, it may show more specifically how the cerebellum contributes to each linguistic sub-domain. For over one hundred years it has been recognized that certain white matter tracts play a key role in language (Dejerine & Dejerine-Klumpke, 1895; Dejerine & Dejerine-Klumpke, 1901; Mirailié, 1896). Modern diffusion-weighted imaging (DWI) methods have allowed investigators to identify structural networks in the cerebrum essential for language (Dick & Tremblay, 2012;

## *CEREBELLAR WHITE MATTER AND LANGUAGE*

Duffau, 2015; Middlebrooks et al., 2017; Krestel et al., 2013; Smits, Jiskoot, & Papma, 2014).

Whether cerebral language networks are structurally connected with portions of the cerebellum activated in language tasks is not known. Although functional connectivity studies have shown correlated activity between linguistically-sensitive cortex and regions of the posterior cerebellum (reviewed in Vias & Dick, 2017) this method is far removed from “ground truth” evidence provided by post-mortem tract tracing. Indeed, findings from functional connectivity often disagree with findings from structural connectivity (for an example, see Metoki et al., 2021).

Findings from tract-tracing have shown that cerebellar connectivity to and from the cerebrum is uniquely defined by two major pathways. The cortico-ponto-cerebellar pathway projects from the cerebral hemispheres with decussation at the pons terminating in the contralateral cerebellar cortex. In contrast, the cerebello-thalamo-cortical pathway begins in the cerebellum then crosses over to synapse on the contralateral thalamus, continuing on to different regions of the cerebral cortex. The dentate nucleus of the cerebellum retains a topographically ordered pattern of connectivity (Steele et al., 2016). It is presumed that this connectivity remains orderly throughout the cerebello-thalamo-cortical and cortico-ponto-cerebellar pathway tracts.

### Current Study

The goal of this study is to use DWI to help disentangle the role of the cerebellum in language comprehension. DWI provides information about what brain regions are communicating with each other via a mathematical model of axonal connectivity. Information about axonal connectivity can be used to determine which facets of language are mediated by the cerebellum.

## CEREBELLAR WHITE MATTER AND LANGUAGE

We used a tractography pipeline that we previously developed for studying the role of the cerebellum in theory of mind (Metoki et al., 2021). We applied this pipeline to language ROIs in the cerebellum and cerebrum. Cerebellar language ROIs were derived from the sentence comprehension task in the HCP task-fMRI data set (Binder et al., 2011). Cerebral ROIs were chosen *a priori* based on the sentence comprehension literature (Barch et al., 2013; Binder et al., 2011; Booth et al., 2007; Fengler et al., 2016; Friederici et al., 2003; Keller et al., 2001; Kieren & Buckner, 2009; Rogalsky et al., 2008). We focused on language comprehension, rather than overt language production, with the goal of reducing the potential impact of motor processing. Because language tends to be strongly left lateralized in the cerebrum (Frost et al., 1999; Mariën et al., 2001; Takaya et al., 2015) and the cerebellum has crossed structural connectivity with the cerebrum (Gonzalo-Ruiz, & Leichnetz, 1990; Ito, et al., 1986; Kelly & Strick, 2003), we performed lateralized tractography between language-sensitive ROIs in the right cerebellum to language-sensitive ROIs in the left cerebrum. Based on prior DWI work (Metoki et al., 2021) as well as monkey histology work (Glickstein, May, & Mercier, 1985; Schmahmann, 1996) we predicted that there would be significantly more fibers to linguistically-sensitive frontal ROIs, like the left inferior frontal gyrus, as compared to linguistically-sensitive ROIs in the temporal lobe.

### **Materials and Methods**

#### *Dataset and Participants*

All data used in this study are part of the HCP dataset, specifically the WU-Minn HCP Consortium S900 Release (WU-Minn HCP Consortium, 2015). This dataset is publicly available and accessible at <https://www.humanconnectome.org>. Only participants that completed all imaging sessions of interest (T1/T2, task fMRI (tfMRI)), and DWI scans were included in this

## *CEREBELLAR WHITE MATTER AND LANGUAGE*

study. We restricted our population to only right-handed subjects using the Edinburgh Handedness questionnaire (Oldfield 1971). We chose a random subset of 100 participants (50 females,  $M = 27.89$ ,  $SD = 3.9$ ), as using a large sample size incurs a computational cost, given that probabilistic tractography is mathematically intensive. Unless otherwise stated, all significant results reported in this study were corrected for multiple comparisons using the false discovery rate correction (FDR; Benjamini and Hochberg, 1995).

### Overview of HCP protocol

A detailed description of the HCP data acquisition and preprocessing pipelines can be found elsewhere (Van Essen et al., 2012; Barch et al., 2013; Glasser et al., 2013; Smith et al., 2013). Briefly, the HCP protocol includes acquisition of structural MRI, task-state fMRI, diffusion MRI, and extensive behavioral testing. The imaging data used in this article are the “minimally preprocessed” subjects included in the WU-Minn HCP Consortium S900 Release (WU-Minn HCP Consortium, 2015). Additional details of imaging protocols, preprocessing pipelines, and in-scanner task protocols can be found in the Supplementary Material.

Task-state fMRI encompasses seven major domains; three of which were used in this study: (1) working memory/cognitive control systems; (2) motor (visual, motion, somatosensory, and motor systems); and (3) language comprehension. The main task of interest was the language task (Binder et al., 2011). Participants in the language task listened to stories adapted from Aesop’s fables ([www.aesopfables.com](http://www.aesopfables.com)). Sentences were read aloud by a text-to-speech program to participants in the scanner. After listening to the stories, the participants were presented with a two-answer forced choice question about the contents of the story. The question

## *CEREBELLAR WHITE MATTER AND LANGUAGE*

was meant to probe understanding about the theme of the story, thus evoking activations related to comprehension (Binder et al., 2011). Participants selected one of the two answers by pushing a button. Specific details about the contents of the stories such as number of events, number of actors, mean sentence length, and duration are described in detail by Binder and colleagues (2011). The accompanying control task involved participants doing math problems. The design of this task was the same as the language task, with the same text-to-speech method used to present the stimuli. Rather than listening to a story, participants were read math problems aloud (“six times two equals...”). Participants were presented with a mathematical problem and were asked a two-answer forced choice question. The difficulty of the math task was increased after six correct responses and decreased in difficulty after one incorrect response. The results of the behavioral task in the scanner did not yield enough variance to examine its potential relationship with our white matter pathways. Instead, we included participants’ performance on the NIH Toolbox Picture Vocabulary Test as our dependent behavioral measure. This was a measure of receptive language, which is often used to assess vocabulary and comprehension in children. This version of the task was created to be adaptive, which allowed for more variation in this data. (see Gershon et al. (2014) for more details). Descriptions of the working memory and motor tasks, used in the overlap and control analyses, are further described in the Supplementary Material.

### Regions of Interest (ROIs)

We used two sets of ROIs for our analyses: one set in the cerebrum and one in the cerebellum. Because language is strongly lateralized, we limited our ROIs to the left cerebral



## *CEREBELLAR WHITE MATTER AND LANGUAGE*

hemisphere and to the right cerebellum. The set of cerebral ROIs were drawn from prior work on language. The ROIs included the following: angular gyrus (ANG; Fengler et al., 2016; Keller et al., 2001; Van Ettinger-Veenstra et al., 2016), dorsomedial prefrontal cortex (DLPFC; Keller et al., 2001; Kieren & Buckner, 2009), superior temporal gyrus (STG; Barch et al., 2013; Binder et al., 2011; Booth et al., 2007; Fengler et al., 2016; Friederici et al., 2003; Keller et al., 2001; Turken & Dronkers, 2011), middle temporal gyrus (MTG; Binder et al., 2011; Keller et al., 2001; Turken & Dronkers, 2011; Van Ettinger-Veenstra et al., 2016), inferior temporal gyrus (ITG; Ikuta et al., 2006), temporal pole (TP; Barch et al., 2013; Binder et al., 2011), inferior frontal gyrus/Broca's (IFG; Barch et al., 2013; Binder et al., 2011; Booth et al., 2007; Van Ettinger-Veenstra et al., 2016) and posterior superior portion of the temporal lobe (PST; Just et al., 1996; Mesulam et al., 2015). This area is often considered to be synonymous with Wernicke's Area; however, because there is a lack of consensus regarding its location in the field (Tremblay & Dick, 2016), throughout this paper we will refer to this area as the posterior superior temporal lobe (PST). Although other brain areas also support language, we focused on regions that have been consistently implicated in sentence comprehension. Coordinates for ROIs were taken from Neurosynth (<https://neurosynth.org/>) by searching for the name of the region under 'terms' and taking the voxel with the highest z-score using a cluster analysis. Using the term 'superior posterior' produced an activation map closest to the agreed-upon anatomical location of Wernicke's Area (Tremblay & Dick, 2016). Unfortunately, the highest z-scored voxel produced under the term 'posterior superior' was too posterior for the aims of this study. Instead, we took the highest z-scored voxel that was also close enough to Heschl's gyrus as justification for using it to represent the PST. See Table A in the Supplementary Material for exact MNI

## CEREBELLAR WHITE MATTER AND LANGUAGE

coordinates and accompanying z-scores for each ROI. Subsequently, each coordinate was then transformed into a 6mm sphere using FSL software, to be used in the following analyses.

For the ROIs in the cerebellum, we used a different approach. Although several studies have attempted to functionally map the cerebellar cortex (Buckner et al., 2011; Diedrichsen & Zotow, 2015; Guell et al., 2018a; 2018b; King et al., 2019; Krienen & Buckner, 2009; Marek et al., 2018; Riedel et al., 2015), there is no consensus about functional boundaries within the cerebellum. Hence, it was impossible to employ the same approach as we did with the predefined cerebral ROIs. Instead, we used a data-driven approach. Following the method used by Guell et al. (2018a), we transformed FSL's level 2 individual cope files (results of within-subject fixed-effects grayordinate-based analyses which generate output files that index mean effects for an individual subject averaged across the 2 scan runs for a task) into Cohen's  $d$  group maps by first transforming the grayordinate.dscalar.nii files to NIfTI. We then used FSL commands `fslselectvols` to extract the contrast of interest "story > math" for each individual, and `fslmerge`, `fsmaths -Tmean`, `-Tstd`, and `-div` to merge the individual contrast images, extract the mean, and the standard deviation, and divide the two, ultimately getting group Cohen's  $d$  maps for the contrasts "story > math" (language), "2-back > 0-back" (working memory), and "average" (motor) based on a larger sample of 671 subjects. The HCP S900 Release provides level 3 group z-maps, but Cohen's  $d$  maps made it possible to observe the effect size of each task contrast rather than the significance of the BOLD signal change. A sample of 671 subjects ensures that a  $d$  value higher than 0.5 (Cohen 1988) will be statistically significant even after correction for multiple comparisons ( $d = z/\sqrt{n}$ ,  $d > 0.5$  we have  $z > 12.95$  for  $N = 671$ ; analysis of 17,853 cerebellar voxels would require  $p < 0.000028$  after Bonferroni correction, and  $p < 0.000028$  is

## *CEREBELLAR WHITE MATTER AND LANGUAGE*

equivalent to  $z > 4.026$ ). Accordingly, we used FSL's cluster tool, the Cohen's  $d$  maps, and a threshold of 0.5 to extract clusters of activation for each task and local maxima within each cluster. After using a whole cerebellar mask to retain only the clusters and local maxima within the right cerebellum, clusters smaller than  $100 \text{ mm}^3$  were further removed to omit very small clusters that were considered to be noninformative and would make a comprehensive description of the results too extensive (see Figure 1 for a visualization of the three functional tasks). The coordinates of the remainder local maxima from the "story > math" (language) contrast within the cerebellum were used to create two group cerebellar ROIs (spheres, 6 mm radius) in the right hemisphere. The same method was used to extract the cerebellar motor and working memory ROIs, which were used in control analyses. Seven working memory ROIs were created, also in the right cerebellar hemisphere. Four of the seven regions overlapped, so they were removed from the analysis, leaving three working memory ROIs in the cerebellum. These ROIs were primarily located in Lobule IV, Crus I, and Lobule VIIb.

## CEREBELLAR WHITE MATTER AND LANGUAGE

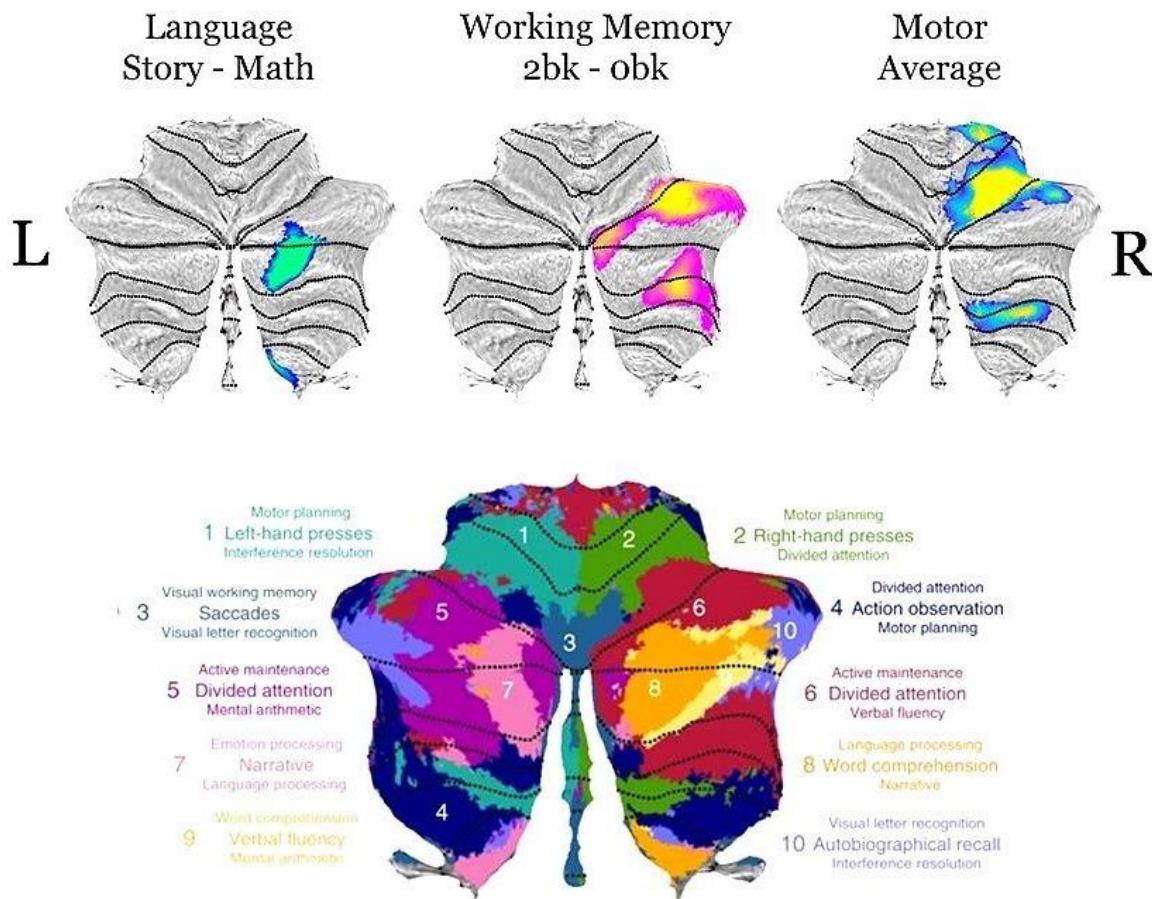

**Figure 1.** (top row) Functional activations to three tasks (language, working memory, and motor) displayed on a flatmap of the cerebellum. Only activations within the right cerebellar hemisphere are displayed. The bottom row depicts a figure from King et al (2019). Note the similar activation patterns. *Image used with permission from author.*

### Cluster Overlap and Euclidean distances

Given that the HCP dataset uses FNIRT registration to the MNI template, we calculated the percentage of overlap of each cerebellar cluster by using Diedrichsen's FNIRT MNI maximum probability map (Diedrichsen et al. 2009). Previous studies have already explored the overlap of several other tasks included in the HCP dataset (Metoki et al., 2021). As a result, we only

## CEREBELLAR WHITE MATTER AND LANGUAGE

included three tasks in this analysis: language, working memory, and motor. We used FSL's atlasq tool to determine the percent overlap of each cerebellar cluster in the cerebellar lobes, hence determining the primary location of each cluster. The Sørensen–Dice coefficient, which is a statistic measuring the similarity of two samples (Dice, 1945; Sørensen, 1948), was then used to calculate the percentage of overlap between the functional clusters generated from all tasks and determine their similarity, and Euclidean distances were calculated to estimate the distances of local maxima within and between clusters. At the individual level, we thresholded  $Z$ -scored  $\beta$ -weights of each subject's activation map for each task contrast to  $> 0$  to retain only increased activation during the tasks and then ran Wilcoxon signed-rank tests between each task pair to examine whether there was a statistical difference between them.

### Diffusion Analyses

All diffusion analyses were completed on Temple University's High-Performance Computing Cluster, OwlsNest. Probabilistic tractography analyses were performed using FSL's probtrackx2 (probabilistic tracking with crossing fibres, version 6.0.2) (Behrens et al., 2003, 2007) in each subject's native space. Results were then transformed to MNI standard space using transformation matrices (see Supplemental Material for more details). An ROI-to-ROI approach was used with cerebral and cerebellar ROIs used as seeds and targets to reconstruct each subject's cerebello-cerebral white matter connections. Fiber tracking was initialized in both directions separately (from seed to target and vice versa) and 5,000 streamlines were drawn from each voxel in each ROI. Tract length correction was also used, as cerebellar tracts are lengthy due to their polysynaptic nature, and length of a tract can introduce more false positives to the

## *CEREBELLAR WHITE MATTER AND LANGUAGE*

data (Jones, 2010). Tractographies were performed to delineate the cerebello-thalamo-cortical pathway, which projects from the cerebellar cortex to the deep cerebellar nuclei then crosses over to synapse on the contralateral thalamus, continuing on to different regions of the cerebral cortex (Middleton & Strick, 1997; Schmahmann & Pandya, 1997; Palesi et al., 2015) and the cortico-ponto-cerebellar pathway, which projects from the cerebral hemispheres to the pons, then to the contralateral cerebellar cortex (Ramnani, 2006; Palesi et al., 2017). For the cerebello-thalamo-cortical tractographies, a binarized mask of the superior cerebellar peduncle in MNI space from the Johns Hopkins University ICBM-DTI-81 white-matter labels atlas (Mori, Wakana, Van Zijl, & Nagae-Poetscher, 2005; Wakana et al., 2007; Hua et al., 2018) and left thalamus in MNI space from the Harvard-Oxford subcortical atlas (Frazier et al., 2005; Makris et al., 2006; Desikan et al., 2006; Goldstein et al., 2007) were used as waypoints respectively. The binarized contralateral cerebellar and cerebral hemispheres, lobes of non-interest, and the opposing cerebellar peduncle were set as exclusion masks. All cerebral masks were created using the Harvard-Oxford cortical atlas (Frazier et al., 2005; Makris et al., 2006; Desikan et al., 2006; Goldstein et al., 2007). For example, cerebello-thalamo-cortical tractography between the right cerebellum and left DLPFC included the right superior cerebellar peduncle and left thalamus as waypoints. The exclusion mask was comprised of the left cerebellar hemisphere, right cerebral hemisphere, middle cerebellar peduncle, precentral gyrus, as well as the temporal, parietal and occipital lobes. For the cortico-ponto-cerebellar pathway tractographies, a binarized mask of the middle cerebellar peduncle in MNI space from the same atlas was used as a waypoint. The contralateral cerebellar and cerebral hemispheres, right superior cerebellar peduncle and lobes of non-interest were used as exclusion masks. For example, cortico-ponto-cerebellar pathway

## *CEREBELLAR WHITE MATTER AND LANGUAGE*

tractography between a left temporal lobe ROI and right cerebellar ROI would entail the middle cerebellar peduncle waypoint mask. The exclusion mask included the left cerebellar hemisphere, right cerebral hemisphere, right superior cerebellar peduncle, precentral gyrus, and frontal, parietal and occipital lobes. Exact regions included in each exclusion mask can be found in Supplementary Table B. The pons was not selected as an inclusion mask due to its absence in any standardized atlases. Despite not having the pons as an orthogonal waypoint in the cortico-ponto-cerebellar pathway tract, we did include the thalamus in the cerebello-thalamo-cortical reconstruction to follow previous literature (Palesi et al., 2015) and to ensure our tractography was as anatomically similar to the ground truth as possible. Our exclusion masks were comprehensive, as we had certain expectations as to where the tract would be traveling and terminating (Schilling et al., 2020). For ROIs in the frontal lobe, we knew that we were not interested in fibers that extended into other regions such as the parietal or temporal lobes, therefore we incorporated them in the exclusion mask for that ROI. We also excluded the motor cortex with the knowledge that there are tracts from the cerebellum to the motor cortex. Exclusion of the motor cortex ensured our results were not due to connections between cerebral motor regions and our ROIs in the cerebellum.

Two metrics were extracted to be used as dependent measures in our analyses. Volume was extracted from the streamline density map using FSL's `fsstats` and normalized using intracranial volume (Voevodskaya et al., 2014). Additionally, fractional anisotropy (FA) was extracted from respective cerebellar peduncles and included as a dependent variable. This was accomplished by taking whole-brain FA scalar data in native space (the result of the command `dtifit`, which is run on eddy-corrected data) and using each of the peduncles to mask the data.

## CEREBELLAR WHITE MATTER AND LANGUAGE

This produced FA maps exclusively within each peduncle. That data was then transformed into standard space, which allowed us to extract microstructural information of each tract within each peduncle. We chose to extract microstructural indices from only the peduncles following previous literature, as the peduncles are generally a good point in the tract to evaluate white matter cohesion (Jossinger et al., 2021; Taoka et al., 2007; Wang et al., 2003). Selecting only one region along the resulting tractography should reduce some of the noise that would be introduced at the termination of the tract, which is a concern for such lengthy fiber pathways. This also allowed us to isolate the contribution of the cerebellar pathways in behavior, without picking up on cerebral white matter pathways (such as the arcuate fasciculus).

### Results

#### Functional domains in the Cerebellum

We first examined whether there was overlap between language, working memory and motor activations in the right cerebellum. We found that there was a significant difference in localizations for all three task pairs. Motor activations were localized to the anterior cerebellum (Lobules I-IV), with some activation in the posterior cerebellum (lobules VIIB and VIIIA). Language activations were localized to Crus I/II and lobule IX. Working memory activations were found in Crus I/II, Lobule VI, Lobule VIIb and Lobule VIIa. Percent overlap between tasks of interest was computed using the Sørensen–Dice coefficient (see Table 1). The Sørensen–Dice coefficient allowed us to evaluate the amount of overlap present in our functional cerebellar activations. Euclidean distances were also calculated between each local maxima within and between clusters. In addition, the  $\beta$ -weights of each subject’s activation map that were previously



## CEREBELLAR WHITE MATTER AND LANGUAGE

extracted, we performed Wilcoxon signed-rank tests for each task pair to examine whether there was a statistical difference between them. The language and motor activations had no overlap, while the language and working memory functional activations had minimal overlap (**0.005%**).

| <b>fMRI Task Activation</b> | <b>Language</b> | <b>Working Memory</b> | <b>Motor</b> |
|-----------------------------|-----------------|-----------------------|--------------|
| <i>Language</i>             |                 |                       |              |
| <i>Working Memory</i>       | 0.0051          |                       |              |
| <i>Motor</i>                | 0               | 0.1507                |              |

**Table 1.** The Sørensen–Dice coefficient between the three functional activations for the tasks of interest in the right cerebellar hemisphere. All three tasks showed very little overlap.

### Cerebellar Structural Connections: language-language

Next, we asked whether language-sensitive regions in the cerebellum are structurally connected to language-sensitive areas in the cerebrum that have been studied for over a century. We ran probabilistic tractography to reconstruct the cerebello-thalamo-cortical and cortico-ponto-cerebellar pathway white matter pathways between ROIs in the right cerebellum and left cerebral cortex. Volume was extracted for the cerebello-thalamo-cortical and cortico-ponto-cerebellar pathways and FA (microstructure) was extracted for the superior (cerebello-thalamo-cortical tracts) or middle (cortico-ponto-cerebellar tract) peduncles.

The average tract volume across all ROIs (before correction for intracranial volume) ranged from 74,714.32mm to 240,083.92mm. The cerebello-thalamo-cortical and cortico-ponto-cerebellar pathway pathways did not show similar connectivity patterns, and the cortico-ponto-

## CEREBELLAR WHITE MATTER AND LANGUAGE

cerebellar pathway had lower overall volume (see Table 2 & Figure 2). For the cerebello-thalamo-cortical pathway, we examined whether there was a difference in the average volume between each cerebellar ROI seed (Crus I and Lobule IX). Using a paired Wilcoxon signed-rank test, we found no significant difference in tract volume based on cerebellar seed. Paired Wilcoxon signed-rank tests were then used to look at differences in volume based on target cerebral ROIs for cerebello-thalamo-cortical pathways. We found that both frontal lobe ROIs (IFG and DLPFC) had significantly higher volumes than those of any other lobe (see Figure 3A). There was no difference between the parietal and temporal lobe tract volumes, but we found some diversity amongst temporal lobe ROIs. We found a significant difference between MTG and PST ( $V = 1168$ ,  $p = 0.033$ ), ITG and PST ( $V = 885$ ,  $p < 0.001$ ), as well as between the TP and PST ( $V = 987$ ,  $p < 0.001$ ). There was also a significant difference between IFG and DLPFC volumes, with IFG having the greater volume between the two ( $V = 707$ ,  $p < 0.001$ ).

| Language ROI | CTC (seeded in Crus I) |          |                    |      | CPC (projecting to Crus I) |          |                    |      |
|--------------|------------------------|----------|--------------------|------|----------------------------|----------|--------------------|------|
|              | Uncorrected Vol.       |          | ICV Corrected Vol. |      | Uncorrected Vol.           |          | ICV Corrected Vol. |      |
|              | Mean                   | SD       | Mean               | SD   | Mean                       | SD       | Mean               | SD   |
| <i>STG</i>   | 150664.72              | 55440.85 | 0.10               | 0.04 | 91803.12                   | 26480.96 | 0.06               | 0.02 |
| <i>MTG</i>   | 150863.84              | 55557.13 | 0.10               | 0.04 | 85077.28                   | 30491.50 | 0.05               | 0.02 |
| <i>ITG</i>   | 150506.24              | 55179.80 | 0.10               | 0.04 | 74621.92                   | 27725.44 | 0.05               | 0.02 |
| <i>ANG</i>   | 150000.88              | 54587.71 | 0.10               | 0.04 | 117644.72                  | 30662.77 | 0.07               | 0.02 |
| <i>TP</i>    | 150073.92              | 55120.73 | 0.10               | 0.04 | 123634.80                  | 28211.70 | 0.08               | 0.02 |
| <i>IFG</i>   | 226984.88              | 74864.76 | 0.14               | 0.05 | 175971.60                  | 41002.20 | 0.08               | 0.03 |
| <i>DLPFC</i> | 228344.00              | 75418.98 | 0.14               | 0.05 | 122568.64                  | 45010.97 | 0.11               | 0.03 |
| <i>PST</i>   | 151325.60              | 55894.72 | 0.10               | 0.04 | 71870.72                   | 29796.13 | 0.05               | 0.02 |

**Table 2.** A summary comparison of the volumes and standard deviations (SD) for the cortico-ponto-cerebellar and cerebello-thalamo-cortical connections to language-related cortical regions. Note that the cerebellar region of interest for all tracts is Crus I for the below delineated descriptives.

*CEREBELLAR WHITE MATTER AND LANGUAGE*

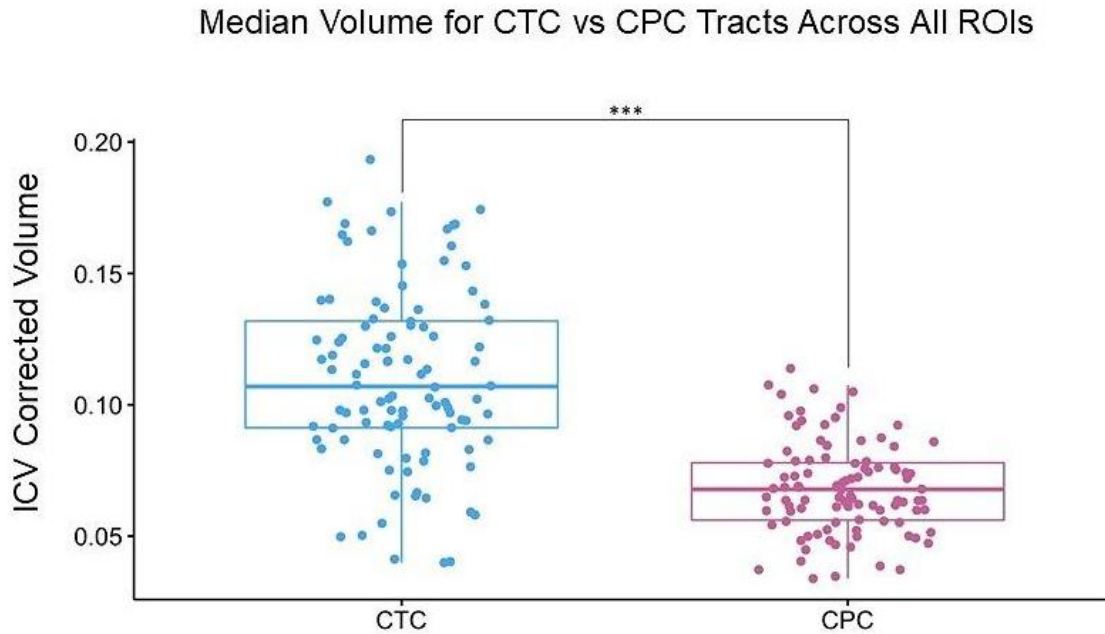

**Figure 2.** Median volume of the linguistic portion of the cerebello-thalamo-cortico (CTC) and cortico-ponto-cerebellar (CPC) tracts. Each tract was averaged across all eight ROIs, resulting in a single average per tract for each participant. Note that the size of the ROIs was identical in both analyses. Each dot represents a single participant; \*\*\* indicates  $p < .001$ .

## CEREBELLAR WHITE MATTER AND LANGUAGE

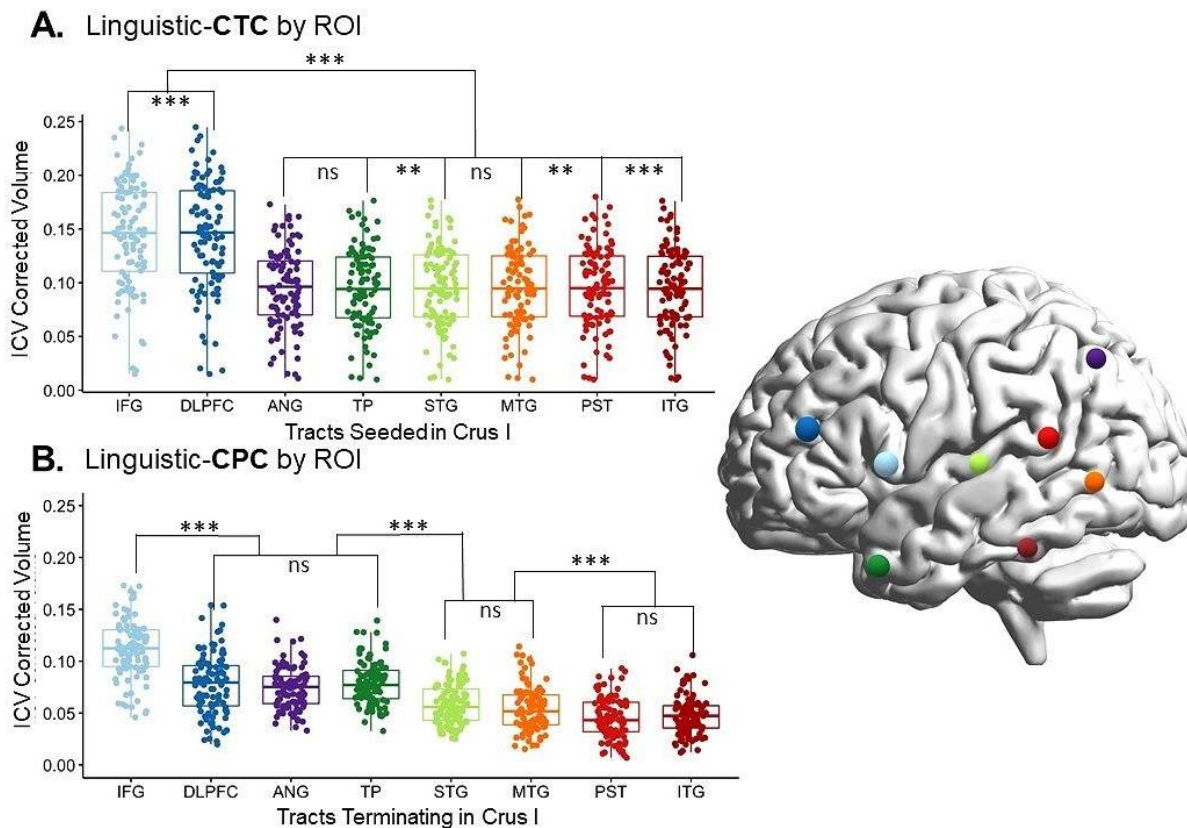

**Figure 3.** Volume comparison A. Between tracts beginning in right Crus I and ending in different left-lateralized cerebral language targets; and B. Between tracts projecting from cerebral language ROIs to the target in Crus I. CTC = cerebello-thalamo-cortical pathway; CPC = cortico-ponto-cerebellar pathway; IFG = inferior frontal gyrus/Broca's; DLPFC = dorsomedial prefrontal cortex; ANG = angular gyrus; PST = posterior superior temporal lobe; STG = superior temporal gyrus; MTG = middle temporal gyrus; ITG = inferior temporal gyrus; TP = temporal pole. For further information about each individual pairwise comparison, see Supplementary Table C; \*\*\* indicates  $p < .001$ , \*\* indicates  $p < 0.05$ , ns = non-significant.

We found a different pattern of connection for the cortico-ponto-cerebellar pathway pathway (see Figure 3B). Again using paired Wilcoxon signed-rank tests, we found that there was still a statistically significant difference between the IFG and all other cerebral ROIs.

## CEREBELLAR WHITE MATTER AND LANGUAGE

Additionally, there were differences in volume in the temporal and parietal ROIs. Rather than the frontal ROIs being greater than the rest and all other tracts being equal to each other, we found that tracts from the angular gyrus, STG, and TP seeds had higher volumes than in the cerebello-thalamo-cortical tract. The overall pattern was IFG>DLPFC $\cong$ ANG $\cong$ TP>STG $\cong$ MTG>WER $\cong$ ITG (with  $\cong$  signaling statistical equivalence). Overall for both tracts, the tracts whose cerebral ROIs were IFG/Broca's Area had the highest volume (significant at  $p < .001$  in all pairwise comparisons - see Supplemental Table C for full list of comparisons).

### Cerebellar Structural Connections: language-working memory

To examine the specificity of these white matter connections, we ran probabilistic tractography between the cerebellar working memory ROIs and cerebral language ROIs using the exact same waypoints and exclusion masks as in the language-language analyses. The language-language connections were then compared to the working memory-language connections. We examined the white matter tracts projecting to and from IFG, as this was our highest volume target and seed. Results showed that the white matter pathways from the working memory cerebellar areas to the language cerebral areas had significantly lower volumes for tracts going to all cerebral regions in the cerebello-thalamo-cortical tracts (see Table 3). Interestingly, in the cortico-ponto-cerebellar pathway tracts, there were two exceptions: working memory ROIs in Crus I and Lobule VIIb. Tracts with these ROIs as targets were not significantly different in volume than those with the language-specific Crus I ROI as the target. These results suggest that

## CEREBELLAR WHITE MATTER AND LANGUAGE

there are specific structural connections between the linguistic cerebellar and cerebral areas, with the possibility that multiple regions of the cerebellum receive input from the same cerebral areas.

| WM ROI             | CTC (projecting to IFG) |          |                    |      | CPC (seeded in IFG) |          |                    |      |
|--------------------|-------------------------|----------|--------------------|------|---------------------|----------|--------------------|------|
|                    | Uncorrected Vol.        |          | ICV Corrected Vol. |      | Uncorrected Vol.    |          | ICV Corrected Vol. |      |
|                    | Mean                    | SD       | Mean               | SD   | Mean                | SD       | Mean               | SD   |
| <i>Lobule IV</i>   | 173764.88               | 41627.86 | 0.11               | 0.03 | 138546.08           | 56472.37 | 0.09               | 0.04 |
| <i>Crus I</i>      | 175658.40               | 41211.88 | 0.11               | 0.03 | 135630.24           | 61385.95 | 0.09               | 0.04 |
| <i>Lobule VIIb</i> | 174411.04               | 40735.06 | 0.11               | 0.03 | 200515.76           | 68625.34 | 0.13               | 0.04 |

**Table 3.** A summary comparison of the volumes and standard deviations (SD) for subsections of the cortico-ponto-cerebellar and cerebello-thalamo-cortical connecting to working memory (WM) regions. For the cortico-ponto-cerebellar projections to WM regions in the cerebellum are seeded in the IFG, while in the cerebello-thalamo-cortical working memory cerebellar regions are projecting to IFG.

### Cerebellar Microstructure: brain-behavior correlations

Next, we investigated the microstructural properties of each tract to determine if we could find a relation between white matter and behavior. We used Spearman’s rho to correlate FA extracted from the peduncles for each tract and the behavioral outcomes of the NIH Toolbox Picture Vocabulary Test from the HCP dataset. Spearman’s rho was used as some of our diffusion data from the cortico-ponto-cerebellar tract violated tests of normality (MTG to Crus I:  $W = 0.972, p = 0.029$ ; DLPFC to Crus I:  $W = 0.967, p = 0.01$ ; MTG to Lobule IX:  $W = 0.966, p = 0.012$ ; IFG to Lobule IX:  $W = 0.935, p < 0.001$ ; DLPFC to Lobule IX:  $W = 0.966, p = 0.011$ ). No significant correlations were found between microstructure of the cerebello-thalamo-cortical

## CEREBELLAR WHITE MATTER AND LANGUAGE

tract and picture naming ability. However, within the cortico-ponto-cerebellar tract there were several significant correlations. For the tracts that had Crus I as the target, tracts seeded in: IFG ( $r = .23, p = 0.02$ ), STG ( $r = .27, p < 0.01$ ), MTG ( $r = .21, p = 0.04$ ), and TP ( $r = .24, p = 0.02$ ) were all significant. For tracts with Lobule IX as the target, tracts seeded in: IFG ( $r = .24, p = 0.02$ ), STG ( $r = .26, p < 0.01$ ), MTG ( $r = .22, p = 0.03$ ) and TP ( $r = .23, p = 0.02$ ) were also significant.

### General Discussion

In this study we mapped structural pathways between language-sensitive regions in the cerebellum and language-sensitive regions in the cerebral cortex. Our first step was to identify regions of the cerebellum sensitive to verbal comprehension and then to examine overlap with motor and working memory task activations. The regions activated to the sentence comprehension contrast were localized to Crus I/Crus II, and Lobule IX (see Figure 1) of the posterior cerebellum. The location of these activations is consistent with prior work that was conducted on different participants and using different stimuli (King et al., 2019).

We found marginal overlap between the language and working memory tasks in Crus I, which is consistent with past literature (Marvel & Desmond, 2010). This overlap could be attributed to the nature of the language task. Participants listened to fables and later made judgements about the fables. This required them to remember the gist of five to nine sentences, a task that invokes verbal working memory. The fact that these fables also involve social scenarios explains our previous finding that the language task has modest overlap with activations from the theory of mind task (Metoki et al., 2021). There is a sizable literature linking portions of the

## *CEREBELLAR WHITE MATTER AND LANGUAGE*

cerebellum to normal and abnormal social cognition as observed in autism spectrum disorder (Stoodley & Tsai, 2021; Van Overwalle et al., 2020). Whether language tasks that are less social and have lower working memory loads (e.g. single word processing) would show overlap with language activations in the cerebellum is unknown. In contrast, there was no overlap between the language comprehension task and the motor task.

The observed overlap led us to conduct a distance analysis. This showed that each cluster had distinct local maxima. We also analyzed the  $\beta$ -weights for each task at the individual level and found that all task pairs have a significantly different localization of activation. Overall, our results provide support for the hypothesis that the cerebellum contains domain-specific mapping of cognitive functions including language comprehension.

If these cerebellar regions truly play a role in language, they should be structurally connected to regions involved in language in the cerebrum. Histology methods in macaques have revealed an extensive network of fiber paths between the anterior cerebellum and nearly all non-motor regions of the frontal lobe (Clower et al., 2005; Dum & Strick, 2003; Ito, 1984; Kelly & Strick, 2003; Leiner et al., 1993; Middleton & Strick 1997, 2001; Schmahmann & Pandya, 1997). In regards to the parietal lobe, gold-standard histology studies have found connections between the cerebellum and BA 5 and 7 in the macaque parietal lobe (Clower et al., 2005; Glickstein et al., 1985). Other histology studies in macaques have reported the existence of structural connections between the superior temporal lobe (e.g. the length of the superior temporal gyrus (excepting A1), as well as the depths of the superior temporal sulcus), with the cerebellum (Schmahmann & Pandya, 1991). However there are little to no connections between most of the middle temporal gyrus and inferior temporal gyrus and the cerebellum (Schmahmann



## *CEREBELLAR WHITE MATTER AND LANGUAGE*

& Pandya, 1991). Thus, histological findings in macaques predict that we should find strong structural connectivity between the cerebellum and language ROIs in the frontal lobe, and superior temporal lobe, but weaker structural connections between inferior parietal lobe and inferior temporal lobe ROIs and the cerebellum. This prediction must be tempered by the fact that language is a uniquely human trait, and changes have occurred in the human temporal and inferior parietal lobes through the evolution of language.

The results of our probabilistic tractography analysis partially confirmed the above predictions. First, we found that the volume of the cerebello-thalamo-cortical pathway was greater than the volume of the cortico-ponto-cerebellar pathway. This was not entirely unexpected as previous research found this bias when looking at the social portions of the cerebello-thalamo-cortical and cortico-ponto-cerebellar tracts (Metoki et al., 2021). Interpretation of this bias awaits further investigation.

Second, we found that in the cerebello-thalamo-cortical pathway, frontal lobe ROIs captured the majority of the projections from the cerebellum (IFG followed by the DLPFC) (see Figures 3 & 4). There was some elevated connectivity to the PST compared to other temporal lobe ROIs, but nothing compared to the volume of the pathways projecting to the frontal lobe, as was expected based on previous literature (Palesi et al., 2015).

## CEREBELLAR WHITE MATTER AND LANGUAGE

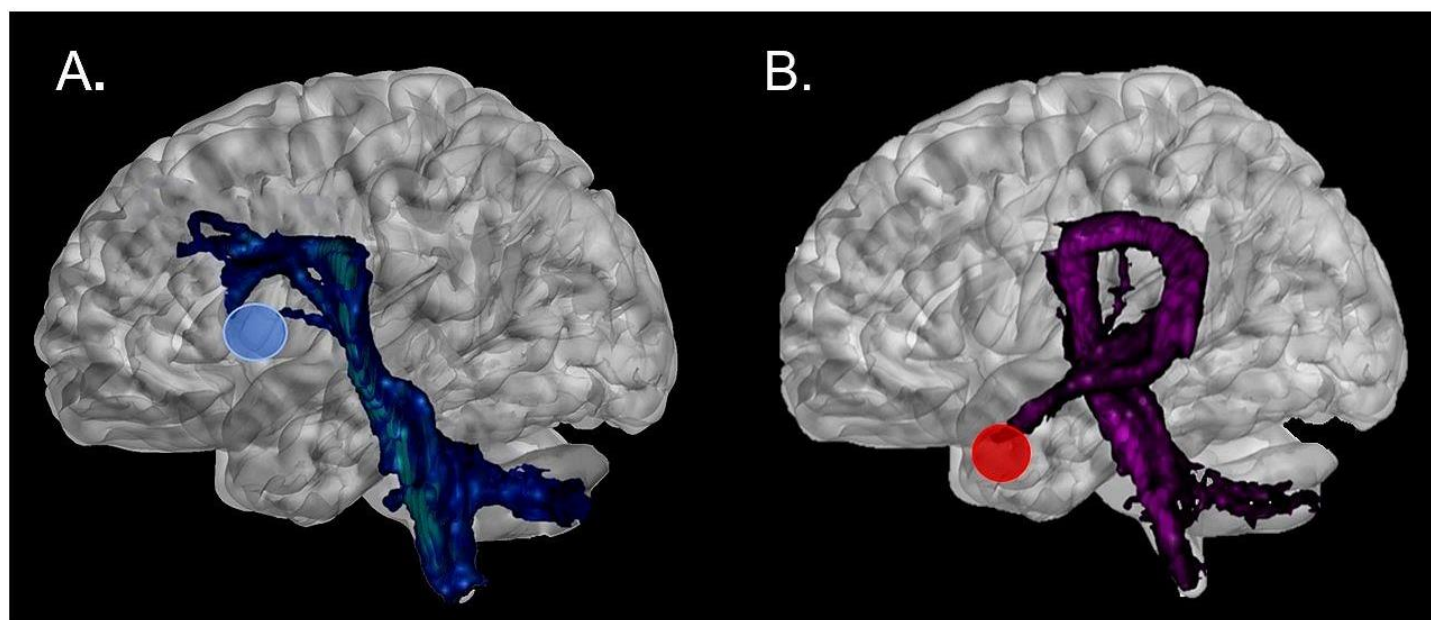

**Figure 4.** Visualization of: (A) The cerebello-thalamo-cortical tract running from Crus I of the cerebellum to inferior frontal gyrus (blue sphere); and (B) The cortico-ponto-cerebellar tract, running from the temporal pole (red sphere) to cerebellar Crus I.

However, the cortico-ponto-cerebellar pathway showed a different, more complex pattern of connectivity. While IFG still held the highest number of connections to the cerebellum, DLPFC, ANG, STG, and TP had elevated connectivity compared to other temporal lobe ROIs. The ANG and TP captured on average the same amount of volume as the DLPFC. The results involving the ANG and STG are not surprising, based on our review of the literature (Schmahmann & Pandya, 1991; Ramnani, 2012). However, finding elevated volume in the projections coming from the TP were unexpected. There is evidence from histology in macaques that the TP section of the superior temporal sulcus (TPO1) sends projections to the pons (Schmahmann, 1996), and likely onwards into the cerebellum.

## CEREBELLAR WHITE MATTER AND LANGUAGE

These results provide new insight on the “closed-loop” nature of cerebellum-to-cerebrum connections. Computational models describing the cerebellum’s functional contribution to motor processes have described a closed loop system in which motor regions in the cerebrum are connected to specific regions within the cerebellum, which in turn are connected to the same regions back in the cerebrum (Ito, 2008; Kawato & Gomi, 1992; Wolpert et al., 1998). Evidence of closed-loop cerebello-cerebral connections that would be critical for non-motor processes have also been found (Palesi et al., 2017; Salmi et al., 2010; Strick et al., 2009), including closed-loops between the posterior cerebellum and the DLPFC (Kelly & Strick, 2003). However, as noted by Moberget and Ivry (2016), “... a close examination of the primate data suggests that [closed loops] may not always be the case.” The asymmetry between the cerebello-thalamo-cortical and cortico-ponto-cerebellar pathway in our functionally defined ROIs suggest that multiple regions across the cerebral cortex may be providing input into a specific region of the cerebellum, which then outputs to a subset of those input regions. This finding highlights that the closed-loop nature of cerebellar connectivity may be more in line with a network modulation function - a many to one - rather than a single region to region, or one to one, modulation. Individual regions of the cerebellum would be well-suited to receive inputs from a diverse set of brain regions, as cerebellum “microcomplexes”, thought to be the computational building blocks of the cerebellum, include an initial layer of cells that are well-suited for high-dimensional inputs (Hull, 2020; Raymond & Medina, 2018).

To date, only a small number of studies have examined the cerebello-thalamo-cortical and cortico-ponto-cerebellar pathways *in vivo* (Karavasilis et al., 2019; Keser et al., 2015;

## CEREBELLAR WHITE MATTER AND LANGUAGE

Jissendi et al., 2008; Sokolov et al., 2014). This is likely due to the technical challenges present in doing tractography along a long, polysynaptic pathway that has crossovers and sharp turns. Thus most of the existing literature has simply looked at white matter within the cerebellum (e.g. the peduncles) rather than between the cerebellum and cerebrum. Our study is unique in that we carefully measured the linguistically-relevant portion of the ouroboros loop in a large sample with excellent data quality.

Lack of post-mortem histological work in humans on the cerebello-thalamo-cortical and cortico-ponto-cerebellar pathways means that the “ground truth” can be difficult to establish. This is especially pertinent for studies of language, given that macaques lack this facility. Previous studies that have reconstructed these white matter pathways relied solely upon diffusion *tensor* imaging, which has had notable issues with crossing fibers (Lee et al., 2015). Crossing fibers are in abundance in the brainstem and within these tracts of interest. Our tractography has improved upon this with the use of the ball-and-stick model, which is better at resolving crossing fibers (Behrens et al., 2007). We modeled our methods after Paelsi et al. (2017) who found evidence of projections of the cortico-ponto-cerebellar pathway originating from the temporal lobe with constrained spherical deconvolution. This method also has a better ability to solve for crossing fibers (Daducci et al., 2013; Tournier, Calamante & Connelly, 2012). Their analysis of all projections from association cortices showed that the temporal lobe sends projects to the cerebellum via the cortico-ponto-cerebellar pathway, even though it may not receive projections from the cerebello-thalamo-cortical. Schmahmann and Pandya (1991) also observed projections from the superior temporal sulcus to the cortico-ponto-cerebellar pathway in rhesus monkeys, so

## *CEREBELLAR WHITE MATTER AND LANGUAGE*

the results are not completely unfounded. It is possible these findings may be the result of the software and not true projections found in the human brain, but converging evidence across multiple methodologies may suggest some shared truth.

In an exploratory analysis of DWI microstructure data, we found that individual differences in FA values in the cortico-ponto-cerebellar pathway correlated with receptive vocabulary ability. In other words, individuals with higher FA in the middle cerebellar peduncle of the cortico-ponto-cerebellar tract had better ability to identify a picture that matched a word with which they were presented. Note that all tracts projecting from regions of the temporal lobe, except for PST, had weak to moderate positive correlations with the receptive language. This suggests that individuals who have faster and more efficient transmission of auditory-linguistic information to the cerebellum perform better on single-word comprehension tasks. This is reflected in our findings with the TP and the STG. The correlation of the MTG ROI may be a little less straight-forward. Some evidence has shown that the posterior MTG is involved in semantic control (Davey et al., 2016), while others have postulated that it could be involved in some form of integration between lobes (Turken & Dronkers, 2011). In addition, IFG also showed weak to moderate positive correlation with the task, which makes sense with its role in lexical and semantic processing (Dapretto & Bookheimer, 1999; Friederici, Opitz, & Von Cramon, 2000).

## CEREBELLAR WHITE MATTER AND LANGUAGE

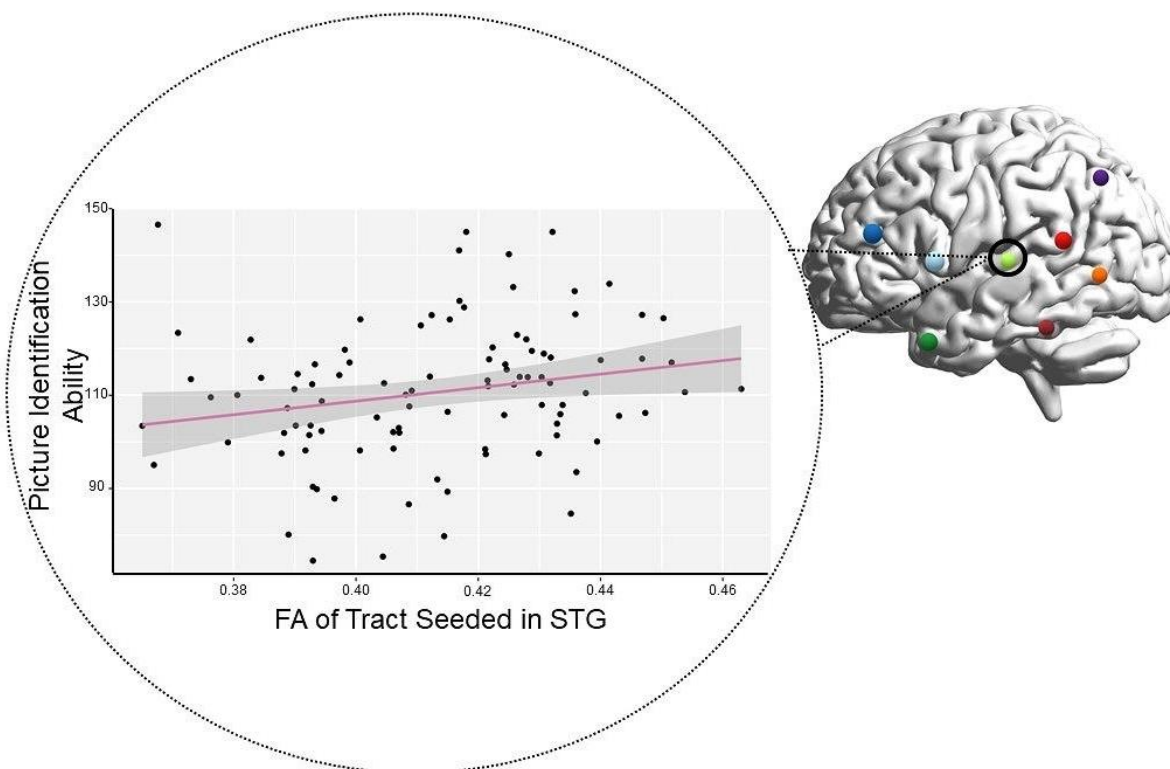

**Figure 5.** Correlation between microstructure (FA) of the STG-portion of the cortico-ponto-cerebellar tract plotted on the x-axis and single-word comprehension on the y-axis. Each dot represents a single participant.

How selective are these findings? Our results show that there is some domain-specific connectivity to the cerebrum, even within large regions such as Crus I. Tracts from working memory ROIs in the cerebellum to language ROIs in the cerebrum were volumetrically smaller than the language-language tracts. This occurred even when the cerebellar ROIs from the different tasks were in the same lobule of the cerebellum. Some specificity was lost in the cortico-ponto-cerebellar tract (with fibers projecting to regions derived from the working memory task). Tracts seeded in IFG and projecting to working memory cerebellar regions Crus I,

## *CEREBELLAR WHITE MATTER AND LANGUAGE*

were not significantly different in volume from the tracts projecting to the language ROI (also located in Crus I). The longer tracts get, the less accurate they are, so this result may just be due to the fact that the regions of interest we had were located in the same lobule of the cerebellum. The specificity that these white matter tracts hold cannot be completely resolved without a more in depth knowledge of what these pathways truly look like in humans. In addition, our findings help localize what type of cerebellar damage should cause language comprehension deficits: lesions to right Crus I or Lobule IX, as well as to the polysynaptic fiber paths connecting these regions to the cerebrum. Individuals with lesions that preserve these regions are not expected to exhibit any language comprehension deficits.

### Limitations and Future Directions

First, the task set included in the HCP dataset is limited, which limited the cerebellar seed regions used in our tractography analysis. Future studies should test the limits of our findings by employing a range of language production and reception tasks involving lower-and higher-level processing, mapping the functional ROIs, and conducting tractography. Second, diffusion MRI tractography has been criticized for having a high rate of false positives (Maier-Hein et al., 2017; Thomas et al., 2014; Reveley et al., 2015). The best solution to this problem is to conduct histology-guided tractography analyses followed by replication in independent samples. Third, the relationship between structural connectivity, as described here, and functional connectivity, as reported in many prior studies (reviewed in Vias & Dick, 2017) in regards to the linguistic cerebellum needs to be investigated in a larger-scale study. Last, like all neuroimaging analyses, results can depend on various factors including the selection of ROIs, waypoints, thresholding,

## *CEREBELLAR WHITE MATTER AND LANGUAGE*

and software choices, etc. Every analytical decision made in this study was based on prior work exploring similar pathways (Metoki et al., 2021) with a small number of updates based on our understanding of best practices in diffusion imaging. However we are cognizant that diffusion imaging methods are relatively young, and standards are in flux. We hope that future investigators attempt replications of our work and that our findings are robust to different choices made in analytical parameters.

### Conclusions

This neuroimaging study investigated the structural connectivity between language cerebellar and cerebral areas. We found projections from the cerebellum to language regions of the frontal lobe. There was also evidence of input to the cerebellum from other regions of the cerebrum, such as the angular gyrus and the temporal pole portion of the superior temporal sulcus. These findings suggest that regions of the posterior cerebellum play a key role in language comprehension. We also found that these white matter tracts were, at least in part, specific to language-sensitive areas of the cerebellum and cerebrum.



## CEREBELLAR WHITE MATTER AND LANGUAGE

### References

- Ahmadian, N., van Baarsen, K., van Zandvoort, M., & Robe, P. A. (2019). The Cerebellar Cognitive Affective Syndrome—a Meta-analysis. *Cerebellum*, *18*(5): 941–950. doi: 10.1007/s12311-019-01060-2
- Baddeley, A. D., & Logie, R. H. (1999). Working memory: The multiple-component model. In A. Miyake & P. Shah (Eds.), *Models of working memory: Mechanisms of active maintenance and executive control* (pp. 28–61). *Cambridge University Press*. doi: 10.1017/CBO9781139174909.005
- Barch, D. M., Burgess, G. C., Harms, M. P., Petersen, S. E., Schlaggar, B. L., Corbetta, M., Glasser, M. F., Curtiss, S., Dixit, S., Feldt, C., et al. (2013). Function in the human connectome: task-fMRI and individual differences in behavior. *Neuroimage*, *80*: 169–189.
- Behrens, T. E. J., Woolrich, M. W., Jenkinson, M., Johansen-Berg, H., Nunes, R. G., Clare, S., Matthews, P. M., Brady, J. M., & Smith, S. M. (2003). Characterization and propagation of uncertainty in diffusion-weighted MR imaging. *Magn Reson Med*, *50*: 1077–1088.
- Behrens, T. E. J., Berg, H. J., Jbabdi, S., Rushworth, M. F. S., & Woolrich, M. W. (2007). Probabilistic diffusion tractography with multiple fibre orientations: what can we gain? *Neuroimage*, *34*: 144–155.
- Benjamini, Y., & Hochberg, Y. (1995). Controlling the false discovery rate: a practical and powerful approach to multiple testing. *J R I State Dent Soc*, *57*: 289–300.
- Binder, J. R., Gross, W. L., Allendorfer, J. B., Bonilha, L., Chapin, J., Edwards, J. C., Grabowski, T. J., Langfitt, J. T., Loring, D. W., Lowe, M. J., et al. (2011). Mapping anterior temporal lobe language areas with fMRI: a multicenter normative study. *Neuroimage*, *54*: 1465–1475.
- Booth, J. R., Wood, L., Lu, D., Houk, J. C., & Bitan, T. (2007). The role of the basal ganglia and cerebellum in language processing. *Brain Research*, *1133*: 136-144.
- Bostan, A. C., Dum, R. P., & Strick, P. L. (2013). Cerebellar networks with the cerebral cortex and basal ganglia. *Trends in cognitive sciences*, *17*(5): 241–254. doi: 10.1016/j.tics.2013.03.003
- Brodal, P., & Bjaalie, J. G. (1997). Salient anatomic features of the cortico-ponto-cerebellar pathway. *Prog Brain Res*, *114*: 227–250.

## CEREBELLAR WHITE MATTER AND LANGUAGE

- Buckner, R. L., Krienen, F. M., Castellanos, A., Diaz, J. C., & Yeo, B. T. T. (2011). The organization of the human cerebellum estimated by intrinsic functional connectivity. *J Neurophysiol*, *106*: 2322–2345.
- Buckner, R. L., Krienen, F. M., & Yeo, B. T. T. (2013). Opportunities and limitations of intrinsic functional connectivity MRI. *Nat Neurosci*, *16*(7): 832–837. doi: 10.1038/nn.3423.
- Caplan, D., & Waters, G. (1999). Verbal working memory and sentence comprehension. *Behavioral and Brain Sciences*, *22*(1), 77-94. doi:10.1017/S0140525X99001788
- Clower, D. M., Dum, R. P., & Strick, P. L. (2005). Basal ganglia and cerebellar inputs to AIP. *Cereb Cortex*, *15*: 913–920.
- Chen, S. H., & Desmond, J. E. (2005). Cerebrocerebellar networks during articulatory rehearsal and verbal working memory tasks. *NeuroImage*, *24*(2), 332–338. doi: 10.1016/j.neuroimage.2004.08.032
- Daducci, A., Canales-Rodríguez, E. J., Descoteaux, M., Garyfallidis, E., Gur, Y., Lin, Y. C., Mani, M., Merlet, S., Paquette, M., Ramirez-Manzanares, A., Reisert, M., Reis Rodrigues, P., Seppehrband, F., Caruyer, E., Choupan, J., Deriche, R., Jacob, M., Menegaz, G., Prčková, V., Rivera, M., ... Thiran, J. P. (2014). Quantitative comparison of reconstruction methods for intra-voxel fiber recovery from diffusion MRI. *IEEE transactions on medical imaging*, *33*(2), 384–399. doi: 10.1109/TMI.2013.2285500
- Dapretto M., & Bookheimer S. Y. (1999). Form and content: dissociating syntax and semantics in sentence comprehension. *Neuron*, *24*: 427–432.
- Dejerine, J., & Dejerine-Klumpke, A. (1895). Anatomie des Centres Nerveux Rueff et Cie., Paris.
- Dejerine, J., & Dejerine-Klumpke, A. (1901). Anatomie des Centres Nerveux Rueff et Cie, Paris.
- Desikan R. S., Ségonne, F., Fischl, B., Quinn, B. T., Dickerson, B. C., Blacker, D., Buckner, R. L., Dale, A. M., Maguire, R. P., Hyman, B. T., Albert, M. S., & Killiany, R. J. (2006). An automated labeling system for subdividing the human cerebral cortex on MRI scans into gyral based regions of interest. *Neuroimage*, *31*(3): 968-80.
- De Smet, H. J., Baillieux, H., De Deyn, P. P., Marien, P., & Paquier, P. (2007). The Cerebellum and Language: The Story So Far. *Folia Phoniatr Logop*, *59*: 165-170.

## CEREBELLAR WHITE MATTER AND LANGUAGE

Desmond, J. E., Gabrieli, J. D., Wagner, A. D., Ginier, B. L., & Glover, G. H. (1997). Lobular patterns of cerebellar activation in verbal working-memory and finger-tapping tasks as revealed by functional MRI. *Journal of Neuroscience*, *17*(24), 9675–9685. doi: 10.1523/JNEUROSCI.17-24-09675.1997

Dick, A. S. & Tremblay, P. (2012). Beyond the arcuate fasciculus: consensus and controversy in the connectonal anatomy of language. *Brain*, *135*(12): 3529-3550.

Diedrichsen, J., Balsters, J. H., Flavell, J., Cussans, E., & Ramnani, N. (2009). A probabilistic MR atlas of the human cerebellum. *Neuroimage*, *46*: 39–46.

Diedrichsen, J., & Zotow, E. (2015). Surface-based display of volume-averaged cerebellar imaging data. *PLoS One*, *10*: e0133402.

Doyon, J., Laforce, R., Jr, Bouchard, G., Gaudreau, D., Roy, J., Poirier, M., Bédard, P. J., Bédard, F., & Bouchard, J. P. (1998). Role of the striatum, cerebellum and frontal lobes in the automatization of a repeated visuomotor sequence of movements. *Neuropsychologia*, *36*(7), 625–641. doi: 10.1016/s0028-3932(97)00168-1

Duffau, H. (2015). Stimulation mapping of white matter tracts to study brain functional connectivity. *Nature Reviews Neurology*, *11*: 255-265.

Dum, R. P., & Strick, P. L. (2003). An unfolded map of the cerebellar dentate nucleus and its projections to the cerebral cortex. *J Neurophysiol.*, *89*: 634–639.

Elam, J. (2021). HCP-ya data dictionary- updated for the 1200 subject release. HCP wiki. Retrieved March 15, 2022, from [https://wiki.humanconnectome.org/display/PublicData/HCP-YA+Data+Dictionary-+Updated+for+the+1200+Subject+Release#HCPYADictionaryUpdatedforthe1200SubjectRelease-Instrument:Language/VocabularyComprehension\(PictureVocabulary\)](https://wiki.humanconnectome.org/display/PublicData/HCP-YA+Data+Dictionary-+Updated+for+the+1200+Subject+Release#HCPYADictionaryUpdatedforthe1200SubjectRelease-Instrument:Language/VocabularyComprehension(PictureVocabulary))

Fabbro, F., Tavano, A., Corti, S., Bresolin, N., De Fabritiis, P., & Borgatti, R. (2004). Longterm neuropsychological deficits after cerebellar infarctions in two young twins. *Neuropsychologia*, *42*: 536–45.

Fedorov, A., Beichel, R., Kalpathy-Cramer, J., Finet, J., Fillion-Robin, J-C., Pujol, S., Bauer, C., Jennings, D., Fennessy, F.M., Sonka, M., Buatti, J., Aylward, S. R., Miller, J. V., Pieper, S., Kikinis, R. (2012). 3D Slicer as an Image Computing Platform for the Quantitative Imaging Network. *Magn Reson Imaging*, *30*(9): 1323-1341.

## CEREBELLAR WHITE MATTER AND LANGUAGE

Fengler, A., Meyer, L., & Frederici, A. D. (2016). How the brain attunes to sentence processing: Relating behavior, structure, and function. *NeuroImage*, *129*: 268-278.

Fiez, J. A. (2016). The cerebellum and language: Persistent themes and findings. *Brain and Language*, *161*: 1-3.

Ford, A. A., Colon-Perez, L., Triplett, W. T., Gullett, J. M., Mareci, T. H., FitzGerald, D. B. (2013). Imaging white matter in human brainstem. *Front. Hum. Neurosci.*, *7*. doi: 10.3389/fnhum.2013.00400

Frazier, J. A., Chiu, S., Breeze, J. L., Makris, N., Lange, N., Kennedy, D. N., Herbert, M. R., Bent, E. K., Koneru, V. K., Dieterich, M. E., Hodge, S. M., Rauch, S. L., Grant, P. E., Cohen, B. M., Seidman, L. J., Caviness, V. S., & Biederman J. (2005). Structural brain magnetic resonance imaging of limbic and thalamic volumes in pediatric bipolar disorder. *Am J Psychiatry*, *162*(7): 1256-65

Friederici, A. D., Opitz, B., & Von Cramon, D. Y. (2000). Segregating semantic and syntactic aspects of processing in the human brain: an fMRI investigation of different word types. *Cerebral Cortex*, *10*: 698–705.

Frederici, A. D. (2002). Towards a neural basis of auditory sentence processing. *Trends in Cognitive Neuroscience*, *6*(2): 78-84.

Frost, J. A., Binder, J. R., Springer, J. A., Hammeke, T. A., Bellgowan, P. S. F., Rao, S. M., & Cox, R. W. (1999). Language processing is strongly left lateralized in both sexes: Evidence from functional MRI. *Brain*, *122*(2): 199-208.

Fischer, M. H. & Zwaan, R. A. (2008). Embodied Language: A Review of the Role of the Motor System in Language Comprehension. *Quarterly Journal of Experimental Psychology*, *61*(6): 825-850.

Gershon, R. C., Slotkin, J., Manly, J. J., Blitz, D. L., Beaumont, J. L., Schnipke, D., Wallner-Allen, K., Golinkoff, R. M., Gleason, J. B., Hirsh-Pasek, K., Adams, M. J., & Weintraub, S. (2013). IV. NIH TOOLBOX COGNITION BATTERY (CB): MEASURING LANGUAGE (VOCABULARY COMPREHENSION AND READING DECODING). *Monogr Soc Res Child Dev.*, *78*(4): 49-69. doi: 10.1111/mono.12034

Gershon, R. C., Cook, K. F., Mungas, D., Manly, J. J., Slotkin, J., Beaumont, J. L., & Weintraub, S. (2014). Language Measures of the NIH Toolbox Cognition Battery. *J Int Neuropsychol Soc*, *20*(6): 642-651.

## CEREBELLAR WHITE MATTER AND LANGUAGE

Glasser, M.F., Sotiropoulos, S.N., Wilson, J.A., Coalson, T.S., Fischl, B., Andersson, J.L., Xu, J., Jbabdi, S., Webster, M., Polimeni, J.R., et al. (2013). The minimal preprocessing pipelines for the human connectome project. *Neuroimage*, *80*: 105–124.

Glickstein, M., May, J. G. 3rd, & Mercier, B. E. (1985). Corticopontine projection in the macaque: the distribution of labelled cortical cells after large injections of horseradish peroxidase in the pontine nuclei. *The Journal of Comparative Neurology*, *235*(3): 343–359. doi: 10.1002/cne.902350306

Goldstein, J. M, Seidman, L.J, Makris, N., Ahern, T., O'Brien, L. M., Caviness, V. S. Jr., Kennedy, D. N., Faraone, S. V., & Tsuang, M. T. (2007). Hypothalamic abnormalities in schizophrenia: sex effects and genetic vulnerability. *Biol Psychiatry*, *61*(8): 935-945.

Gonzalo-Ruiz, A., & Leichnetz, G. R. (1990). Connections of the caudal cerebellar interpositus complex in a new world monkey (*Cebus apella*). *Brain Research Bulletin*, *25*(6): 919-927.

Griffanti, L., Salimi-Khorshidi, G., Beckmann, C. F., Auerbach, E. J., Douaud, G., Sexton, C. E., Zsoldos, E., Ebmeier, K. P., Filippini, N., Mackay, C. E., Moeller, S., Xu, J., Yacoub, E., Baselli, G., Ugurbil, K., Miller, K. L., & Smith, S. M. (2014). ICA-based artefact removal and accelerated fMRI acquisition for improved resting state network imaging. *NeuroImage*, *95*: 232–247. doi: 10.1016/j.neuroimage.2014.03.034

Guell, X., Gabrieli, J.D.E., & Schmahmann, J.D. (2018a). Triple representation of language, working memory, social and emotion processing in the cerebellum: convergent evidence from task and seed-based resting-state fMRI analyses in a single large cohort. *Neuroimage*. *172*: 437–449.

Guell, X., Schmahmann, J.D., & Gabrieli, J. D. E., & Ghosh, S.S. (2018b). Functional gradients of the cerebellum. *Elife*, *7*: 1–22.

Hoche, F., Guell, X., Vangel, M. G., Sherman, J. C., & Schmahmann, J. D. (2018). The cerebellar cognitive affective/Schmahmann syndrome scale. *Brain: a journal of neurology*, *141*(1): 248–270.

Houston, J., Allendorfer, J., Nenert, R., Goodman, A. M., & Szaflarski, J. P. (2019). White Matter Language Pathways and Language Performance in Healthy Adults Across Ages. *Front Neurosci.*, *13*: 1185.

Hua, K., Zhang, J., Wakana, S., Jiang, H., Li, X., Reich, D. S., Calabresi, P. A., Pekar, J. J., van Zijl, P. C. M., & Mori, S. (2018). Tract probability maps in stereotaxic spaces: analyses of white matter anatomy and tract-specific quantification. *Neuroimage*. *39*: 336–347.

## CEREBELLAR WHITE MATTER AND LANGUAGE

Hull, C. (2020). Prediction signals in the cerebellum: beyond supervised motor learning. *eLife*, 9: e54073. doi: 10.7554/eLife.54073

Ikuta, N., Sugiura, M., Sassa, Y., Wantanabe, J., Akitsuki, Y., Iwata, K., Miura, N., Okamoto, H., Wantanabe, Y., Sato, S., Horie, K., Matsue, Y., & Kawashima, R. (2006). Brain activation during the course of sentence comprehension. *Brain and Language*, 97(2): 154-161.

Ito, M. (1984). *The cerebellum and neural control*. New York: Raven.

Ito, H., Murakami, T., Fukuoka, T., & Kishida, R. (1986). Thalamic fiber connections in a teleost (*Sebastiscus marmoratus*): Visual somatosensory, octavolateral, and cerebellar relay region to the telencephalon. *The Journal of Comparative Neurology*, 250(2): 215-227.

Ito, M. (2008). Control of mental activities by internal models in the cerebellum. *Nature reviews. Neuroscience*, 9(4): 304–313. doi: 10.1038/nrn2332

Ivry, R. B., & Keele, S. W. (1989). Timing Functions of The Cerebellum. *Journal of Cognitive Neuroscience*, 1(2): 136-152.

Jissendi, P., Baudry, S., & Balériaux, D. (2008). Diffusion tensor imaging (DTI) and tractography of the cerebellar projections to prefrontal and posterior parietal cortices: a study at 3T. *Journal of neuroradiology = Journal de neuroradiologie*, 35(1), 42–50. doi: 10.1016/j.neurad.2007.11.001

Jones, D. K. (2010). Challenges and limitations of quantifying brain connectivity in vivo with diffusion MRI. *Imaging Med.*, 2: 341-355.

Jossinger, S., Kronfeld-Duenias, V., Zislis, A. et al. (2021). Speech rate association with cerebellar white-matter diffusivity in adults with persistent developmental stuttering. *Brain Struct Funct*, 226: 801–816. doi: 10.1007/s00429-020-02210-7

Just, M. A., Carpenter, P. A., Keller, T. A., Eddy, W. F., & Thulborn, K. R. (1996). Brain activation modulated by sentence comprehension. *Science*, 274(5284): 114–116. doi: 10.1126/science.274.5284.114

Karavasilis, E., Christidi, F., Velonakis, G., Giavri, Z., & Kelekis, N. L., Efsthopoulos, E. P., Evdokimidis, I., & Dellatolas, G. (2019). Ipsilateral and contralateral cerebro-cerebellar white matter connections: a diffusion tensor imaging study in healthy adults. *J Neuroradiol*, 46: 52–60.

Kawato, M., & Gomi, H. (1992). A computational model of four regions of the cerebellum based on feedback-error learning. *Biological cybernetics*, 68(2), 95–103. doi: 10.1007/BF00201431

## CEREBELLAR WHITE MATTER AND LANGUAGE

Keller, T. A., Carpenter, P. A., & Just, M. A. (2001). The neural bases of sentence comprehension: a fMRI examination of syntactic and lexical processing. *Cerebral cortex*, *11*(3), 223–237.

Kelly, R. M., & Strick, P. L. (2003). Cerebellar Loops with Motor Cortex and Prefrontal Cortex of a Nonhuman Primate. *Journal of Neuroscience*, *23*(23): 8432-8444.

Keser, Z., Hasan, K.M., Mwangi, B.I., Kamali, A., Ucisik-Keser, F.E., Riascos, R.F., Yozbatiran, N., Francisco, G.E., & Narayana, P.A. (2015). Diffusion tensor imaging of the human cerebellar pathways and their interplay with cerebral macrostructure. *Front Neuroanat*. *9*: 1–13.

Kheradmand, A. & Zee, D. S. (2011). Cerebellum and ocular movement. *Frontiers in Neurology*, *2*. doi: 10.3389/fneur.2011.00053

Kieren, F. M., & Buckner, R. L. (2009). Segregated Fronto-Cerebellar Circuits Revealed by Intrinsic Functional Connectivity. *Cerebral Cortex*, *19*(10): 2485–2497.

Kikinis, R., Pieper, S. D., & Vosburgh, K. (2014) 3D Slicer: a platform for subject-specific image analysis, visualization, and clinical support. *Intraoperative Imaging Image-Guided Therapy, Editor* *3*(19): 277–289.

King, M., Hernandez-Castillo, C.R., Poldrack, R.A., Ivry, R.B., & Diedrichsen, J. (2019). Functional boundaries in the human cerebellum revealed by a multi-domain task battery. *Nat Neurosci.*, *22*: 1371–1378.

Krestel, H., Annoni, J., & Jagella, C. (2013). White matter in aphasia: A historical review of Dejerines' studies. *Brain and Language*, *127*(3): 526-532.

Lauro, L. J., Reis, J., Cohen, L. G., Cecchetto, C., & Papagno, C. (2010). A case for the involvement of phonological loop in sentence comprehension. *Neuropsychologia*, *48*(14), 4003–4011. doi: 10.1016/j.neuropsychologia.2010.10.019

LeBel, A., Jain, S., & Huth, A G. (2021). Voxelwise Encoding Models Show That Cerebellar Language Representations Are Highly Conceptual. *Journal of Neuroscience*, *41*(50): 10341-10355.

Lee, D.-H., Park, J. W., Park, S.-H., & Hong, C. (2015) Have You Ever Seen the Impact of Crossing Fiber in DTI?: Demonstration of the Corticospinal Tract Pathway. *PLoS ONE* *10*(7): e0112045. doi: 10.1371/journal.pone.0112045

## CEREBELLAR WHITE MATTER AND LANGUAGE

- Leggio, M. & Molinari, M. (2015). Cerebellar sequencing: a trick for predicting the future. *Cerebellum*, 14(10): 35-38. doi: 10.1007/s12311-014-0616-x.
- Leiner, H.C., Leiner, A.L., & Dow, R.S. (1993). Cognitive and language functions of the human cerebellum. *Trends Neurosci.*, 16: 444–447.
- Makris, N., Goldstein, J.M., Kennedy, D., Hodge, S.M., Caviness, V.S., Faraone, S.V., Tsuang, M.T., & Seidman, L.J. (2006). Decreased volume of left and total anterior insular lobule in schizophrenia. *Schizophr Res.*, 83(2-3): 155-71.
- Maier-Hein, K.H., Neher, P.F., Houde, J.-C., Côté, M.-A., Garyfallidis, E., Zhong, J., Chamberland, M., Yeh, F.-C., Lin, Y.-C., Ji, Q., et al. (2017). The challenge of mapping the human connectome based on diffusion tractography. *Nat Commun.*, 8: 1349.
- Marek, S., Siegel, J. S., Gordon, E. M., Raut, R. V., Gratton, C., Newbold, D. J., Ortega, M., Laumann, T. O., Adeyemo, B., Miller, D. B., et al. (2018). Spatial and temporal organization of the individual human cerebellum. *Neuron*, 100: 977–993.e7. doi: 10.1016/j.neuron.2018.10.010
- Mariën, P., Engelborgs, S., Pickut, B. A., & Deyn, P. P. (2000). Aphasia following cerebellar damage: fact or fallacy? *Journal of Neurolinguistics*, 13(2-3): 145-171.
- Mariën, P., Engelborghs S., Fabbro F., & De Deyn P. P. (2001). The lateralized linguistic cerebellum: a review and a new hypothesis. *Brain Lang*, 79: 580–600.
- Mariën, P., Ackermann, H., Adamaszek, M., Barwood, C. H., Beaton, A., Desmond, J., De Witte, E., Fawcett, A. J., Hertrich, I., Küper, M., Leggio, M., Marvel, C., Molinari, M., Murdoch, B. E., Nicolson, R. I., Schmahmann, J. D., Stoodley, C. J., Thürling, M., Timmann, D., Wouters, E., ... Ziegler, W. (2014). Consensus paper: Language and the cerebellum: an ongoing enigma. *Cerebellum*, 13(3): 386–410. doi: 10.1007/s12311-013-0540-5
- Mariën, P., & Borgatti, R. (2018). Language and the cerebellum. *Handbook of clinical neurology*, 154: 181–202. doi: 10.1016/B978-0-444-63956-1.00011-4
- Marvel, C. L., & Desmond, J. E. (2010). Functional topography of the cerebellum in verbal working memory. *Neuropsychology review*, 20(3): 271–279. doi: 10.1007/s11065-010-9137-7
- Mesulam, M. M., Thompson, C. K., Weintraub, S., & Rogalski, E. J. (2015). The Wernicke conundrum and the anatomy of language comprehension in primary progressive aphasia. *Brain : a journal of neurology*, 138(Pt 8): 2423–2437. doi: 10.1093/brain/awv154



## CEREBELLAR WHITE MATTER AND LANGUAGE

- McKay, N. S., Iwabuchi, S. J., Häberling, I. S., Corballis, M. C., & Kirk, I. J. (2017). Atypical white matter microstructure in left-handed individuals. *Laterality*, 22: 257–267.
- Metoki, A., Wang, Y & Olson, I. R. (2021). The Social Cerebellum: A Large-Scale Investigation of Functional and Structural Specificity and Connectivity. *Cerebral Cortex*, bhab260. doi: 10.1093/cercor/bhab260
- Middlebrooks, E. H., Yagmurlu, K., Szaflarski, J. P. et al. (2017). A contemporary framework of language processing in the human brain in the context of preoperative and intraoperative language mapping. *Neuroradiology*, 59: 69–87. doi: 10.1007/s00234-016-1772-0
- Middleton, F.A., & Strick, P.L. (1997). Cerebellar output channels. *Int Rev Neurobiol.*, 41: 61–82.
- Mirailié, C. (1896). De l'aphasie sensorielle G. Steinheil, Paris.
- Moberget, T., & Ivry, R. B. (2016). Cerebellar contributions to motor control and language comprehension: searching for common computational principles. *Annals of the New York Academy of Sciences*, 1369: 154-171.
- Molinar, M., Leggio, M. G., Ciorra, R., Misciagna, S., & Petrosini, L. (1997). Cerebellum and procedural learning: evidence from focal cerebellar lesions. *Brain*, 120(Pt 10): 1753-1762.
- Mori, S., Wakana, S., Van Zijl, P. C., & Nague-Poetscher, L. M. (2005). MRI atlas of human white matter. *Am J Neuroradiol.*, 27: 1384.
- Murdoch, B. E., Nicolson, R. I., Schmahmann, J. D., Stoodley, C. J., Thürling, M., Timmann, D., Wouters, E., ... Ziegler, W. (2014). Consensus paper: Language and the cerebellum: an ongoing enigma. *Cerebellum*, 13(3): 386–410.
- Nicolson, R. I., Fawcett, A. J., & Dean, P. (2001). Developmental dyslexia: the cerebellar deficit hypothesis. *Trends in neurosciences*, 24(9): 508–511. doi: 10.1016/s0166-2236(00)01896-8.
- Oldfield, R.C. (1971). The assessment and analysis of handedness: the Edinburgh inventory. *Neuropsychologia*. 9: 97–113.
- Palesi, F., Tournier, J. D., Calamante, F., Muhlert, N., Castellazzi, G., Chard, D., D'Angelo, E., & Wheeler-Kingshott, C. A. M. G. (2015). Contralateral cerebello-thalamo-cortical pathways with prominent involvement of associative areas in humans in vivo. *Brain Struct Funct.*, 220: 3369–3384.

## CEREBELLAR WHITE MATTER AND LANGUAGE

Palesi, F., De Rinaldis, A., Castellazzi, G., Calamante, F., Muhlert, N., Chard, D., Tournier, J.D., Magenes, G., D'Angelo, E., & Wheeler-Kingshott, C. A. M. G. (2017). Contralateral cortico-ponto-cerebellar pathways reconstruction in humans in vivo: implications for reciprocal cerebro-cerebellar structural connectivity in motor and non-motor areas. *Sci Rep.*, 7: 1–13.

Peterburs, J., Liang, Y., Cheng, D. T., & Desmond, J. E. (2021). Sensory acquisition functions of the cerebellum in verbal working memory. *Brain Structure and Function*, 226: 833-844.

Pruim, R., Mennes, M., Buitelaar, J. K., & Beckmann, C. F. (2015). Evaluation of ICA-AROMA and alternative strategies for motion artifact removal in resting state fMRI. *NeuroImage*, 112: 278–287. doi: 10.1016/j.neuroimage.2015.02.063

Ramnani, N. (2006). The primate cortico-cerebellar system: anatomy and function. *Nat Rev Neurosci.*, 7: 511–522.

Ramnani N. (2012). Frontal lobe and posterior parietal contributions to the cortico-cerebellar system. *Cerebellum*, 11(2): 366–383. doi: 10.1007/s12311-011-0272-3

Reveley, C., Seth, A. K., Pierpaoli, C., Silva, A. C., Yu, D., Saunders, R. C., Leopold, D. A, & Ye, F. Q. (2015). Superficial white matter fiber systems impede detection of long-range cortical connections in diffusion MR tractography. *Proc Natl Acad Sci USA*, 112: E2820–E2828.

Raymond, J. L., & Medina, J. F. (2018). Computational Principles of Supervised Learning in the Cerebellum. *Annual review of neuroscience*, 41: 233–253. doi: 10.1146/annurev-neuro-080317-061948

Riedel, M. C., Ray, K. L., Dick, A. S., Sutherland, M. T., Hernandez, Z., Fox, P. M., Eickhoff, S. B., Fox, P. T., & Laird, A.R. (2015). Meta-analytic connectivity and behavioral parcellation of the human cerebellum. *Neuroimage*, 117: 327–342.

Rogalsky, C., Matchin, W. & Hickok, G. (2008). Broca's area, sentence comprehension, and working memory: an fMRI study. *Frontiers in Human Neuroscience*, 2: 14.

Salman, M. S. (2002). The cerebellum: It's about time! But timing is not everything--New insights into the role of the cerebellum in timing motor and cognitive tasks. *Journal of Child Neurology*, 17(1): 1–9. doi: 10.1177/088307380201700101

Salmi, J., Pallesen, K. J., Neuvonen, T., Brattico, E., Korvenoja, A., Salonen, O., & Carlson, S. (2010). Cognitive and Motor Loops of the Human Cerebro-cerebellar System. *Journal of Cognitive Neuroscience*, 22(11): 2663-2676.

## CEREBELLAR WHITE MATTER AND LANGUAGE

Schilling, K. G., Petit, L., Rheault, F., Remedios, S., Pierpaoli, C., Anderson, A. W., Landman, B. A., & Descoteaux, A. (2020). Brain connections derived from diffusion MRI tractography can be highly anatomically accurate—if we know where white matter pathways start, where they end, and where they do not go. *Brain Structure and Function*, 225: 2387-2420.

Schmahmann, J. D., & Pandya, D.N. (1991). Projections to the basis pontis from the superior temporal sulcus and superior temporal region in the rhesus monkey. *J Comp Neurol.*, 308: 224–248.

Schmahmann J. D. (1996). From movement to thought: anatomic substrates of the cerebellar contribution to cognitive processing. *Human brain mapping*, 4(3), 174–198. doi: 10.1002/(SICI)1097-0193(1996)4:3<174::AID-HBM3>3.0.CO;2-0

Schmahmann, J.D., & Pandya, D.N. (1997). The cerebrocerebellar system. *Int Rev Neurobiol.*, 41: 31–60.

Schmahmann, J.D., & Sherman, J.C. (1998). The cerebellar cognitive affective syndrome. *Brain*, 121(Pt 4): 561-579.

Schwatze, M., & Kotz, S. A. (2016). Contributions of cerebellar event-based temporal processing and preparatory function to speech perception. *Brain and Language*, 161: 28–32.

Silveri, M. C., & Leggio, M. G. (1994). The cerebellum contributes to linguistic production A case of agrammatic speech following a right cerebellar lesion. *Marco Molinari Neurology Nov.*, 44(11): 2047.

Silveri, M.C. (2021). Contribution of the Cerebellum and the Basal Ganglia to Language Production: Speech, Word Fluency, and Sentence Construction—Evidence from Pathology. *Cerebellum*, 20: 282–294.

Smith, S. M., Vidaurre, D., Beckmann, C. F., Glasser, M. F., Jenkinson, M., Miller, K. L., Nichols, T. E., Robinson, E. C., Salimi-Khorshidi, G., Woolrich, M. W., et al. (2013). Functional connectomics from resting-state fMRI. *Trends Cogn Sci.*, 17: 666–682.

Smits, M., Jiskoot, L. C., & Papma, J. M. (2014). White matter tracts of speech and language. *Seminars in ultrasound, CT, and MR*, 35(5): 504–516. doi: 10.1053/j.sult.2014.06.008

Sokolov, A. A., Erb, M., Grodd, W., & Pavlova, M. A. (2014). Structural Loop Between the Cerebellum and the Superior Temporal Sulcus: Evidence from Diffusion Tensor Imaging. *Cerebral Cortex*, 24(3): 626–632. doi: 10.1093/cercor/bhs346

## CEREBELLAR WHITE MATTER AND LANGUAGE

Sotiropoulos, A. N., Jbabdi, S., Xu, J., Andersson, J. L., Moeller, S., Aurbach, E. J., Glasser, M. F., Hernandez, M., Sapiro, G., Jenkinson, M., Feinberg, . A., Yacoub, E., Lenglet, C., Van Essen, D. C., Ugurbil, K., & Behrens, T. E. J. (2013). Advances in diffusion MRI acquisition and processing in the Human Connectome Project. *NeuroImage*, *80*(15): 125-143.

Spencer, K. A., & Slocumb, D. L. (2007). The neural basis of ataxic dysarthria. *Cerebellum*, *6*(1), 58–65.

Steele, C. J., Anwander, A., Bazin, P.-L., Trampel, R., Schaefer, A., Turner, R., Ramnani, N., & Villringer, A. (2017). Human Cerebellar Sub-millimeter Diffusion Imaging Reveals the Motor and Non-motor Topography of the Dentate Nucleus, *Cerebral Cortex*, *27*(9): 4537–4548. doi: 10.1093/cercor/bhw258

Stoodley, C. J., & Tsai, P. T. (2021). Adaptive Prediction for Social Contexts: The Cerebellar Contribution to Typical and Atypical Social Behaviors. *Annual review of neuroscience*, *44*: 475–493. doi: 10.1146/annurev-neuro-100120-092143

Takaya, S., Kuperberg, G. R., Liu, H., Greve, D. N., Makris, N., & Stufflebeam, S. M. (2015). Asymmetric projections of the arcuate fasciculus to the temporal cortex underlie lateralized language function in the human brain. *Front. Neuroanat.*, *9*.

Taoka, T., Kin, T., Nakagawa, H., Hiraon, M., Sakamoto, M., Wada, T., Takayama, K., Wuttikul, C., Iwasaki, S., Ueno, S., & Kichikawa, K. (2007). Diffusivity and diffusion anisotropy of cerebellar peduncles in cases of spinocerebellar degenerative disease. *NeuroImage*, *37*(2): 387-393.

Thomas, C., Ye, F. Q., Irfanoglu, M. O., Modi, P., Saleem, K. S., Leopold, D. A., & Pierpaoli, C. (2014). Anatomical accuracy of brain connections derived from diffusion MRI tractography is inherently limited. *Proc Natl Acad Sci USA*, *111*: 16574–16579.

Tournier, J. D., Yeh, C., Calamante, F., Cho, K., Connelly, A., & Lin, C. (2008). Resolving crossing fibres using constrained spherical deconvolution: Validation using diffusion-weighted imaging phantom data. *NeuroImage*, *42*(2): 617-625.

Tremblay, P., & Dick, A. S. (2016). Broca and Wernicke are dead, or moving past the classic model of language neurobiology. *Brain and language*, *162*: 60–71. doi: 10.1016/j.bandl.2016.08.004

Van Essen, D. C., Ugurbil, K., Auerbach, E., Barch, D., Behrens, T. E. J., Bucholz, R., Chang, A., Chen, L., Corbetta, M., Curtiss, S. W., et al. (2012). The human connectome project: a data acquisition perspective. *Neuroimage*. *62*: 2222–2231.

## CEREBELLAR WHITE MATTER AND LANGUAGE

Van Ettinger-Veenstra, H., McAllister, A., Lundberg, P., Karlsson, T., & Engström, M., (2016). Higher Language Ability is Related to Angular Gyrus Activation Increase During Semantic Processing, Independent of Sentence Incongruency. *Frontiers in Human Neuroscience*, 10.

Van Overwalle, F., Manto, M., Cattaneo, Z., Clausi, S., Ferrari, C., Gabrieli, J. D. E., et al. (2020). Consensus paper: cerebellum and social cognition. *Cerebellum*, 19: 833–868. doi: 10.1007/s12311-020-01155-1

Vias, C., & Dick, A. S. (2017): Cerebellar Contributions to Language in Typical and Atypical Development: A Review. *Developmental Neuropsychology*: 404-421. doi: 10.1080/87565641.2017.1334783

Vicari, S., Piccini, G., Mercuri, E., Battini, R., Chieffo, D., Bulgheroni, S., Pecini, C., Lucibello, S., Lenzi, S., Moriconi, F., Pane, M., D’Amico, A., Astrea, G. et al. (2018). Implicit learning deficit in children with Duchenne muscular dystrophy: Evidence for a cerebellar cognitive impairment? *PLoS One*, 3(1): e0191164. doi: 10.1371/journal.pone.0191164

Voevodskaya, O., Simmons, A., Nordenskjöld, R., Kullberg, J., Ahlström, H., Lind, L., Wahlund, L., Larsson, E., Westman, E., & ADNI. (2014). The effects of intracranial volume adjustment approaches on multiple regional MRI volumes in healthy aging and Alzheimer's disease. *Frontiers in Aging Neuroscience*, 6.

Wakana, S., Caprihan, A., Panzenboeck, M.M., Fallon, J.H., Perry, M., Gollub, R.L., Hua, K., Zhang, J., Jiang, H., Dubey, P., et al. (2007). Reproducibility of quantitative tractography methods applied to cerebral white matter. *Neuroimage*. 36: 630–644.

Wang, F., Sun, Z., Du, X., Wang, X., Cong, Z., Zhang, H., Zhang, D., & Hong, D. (2003). A diffusion tensor imaging study of middle and superior cerebellar peduncle in male patients with schizophrenia. *Neuroscience Letters*, 348(3): 135-138.

Wolpert, D. M., Miall, R. C., & Kawato, M. (1998). Internal models in the cerebellum. *Trends in cognitive sciences*, 2(9): 338–347. doi: 10.1016/s1364-6613(98)01221-2

WU-Minn HCP Consortium. (2015). WU-Minn HCP 900 subjects release: reference manual, appendix I – protocol guidance and HCP session protocols, pp. 1–55.

Yang, Z., Wu, P., Weng, X., & Bandettini, P. A. (2014). Cerebellum engages in automation of verb-generation skill. *J. Integr Neurosci*, 13(1): 1-17. doi: 10.1142/S0219635214500010.
